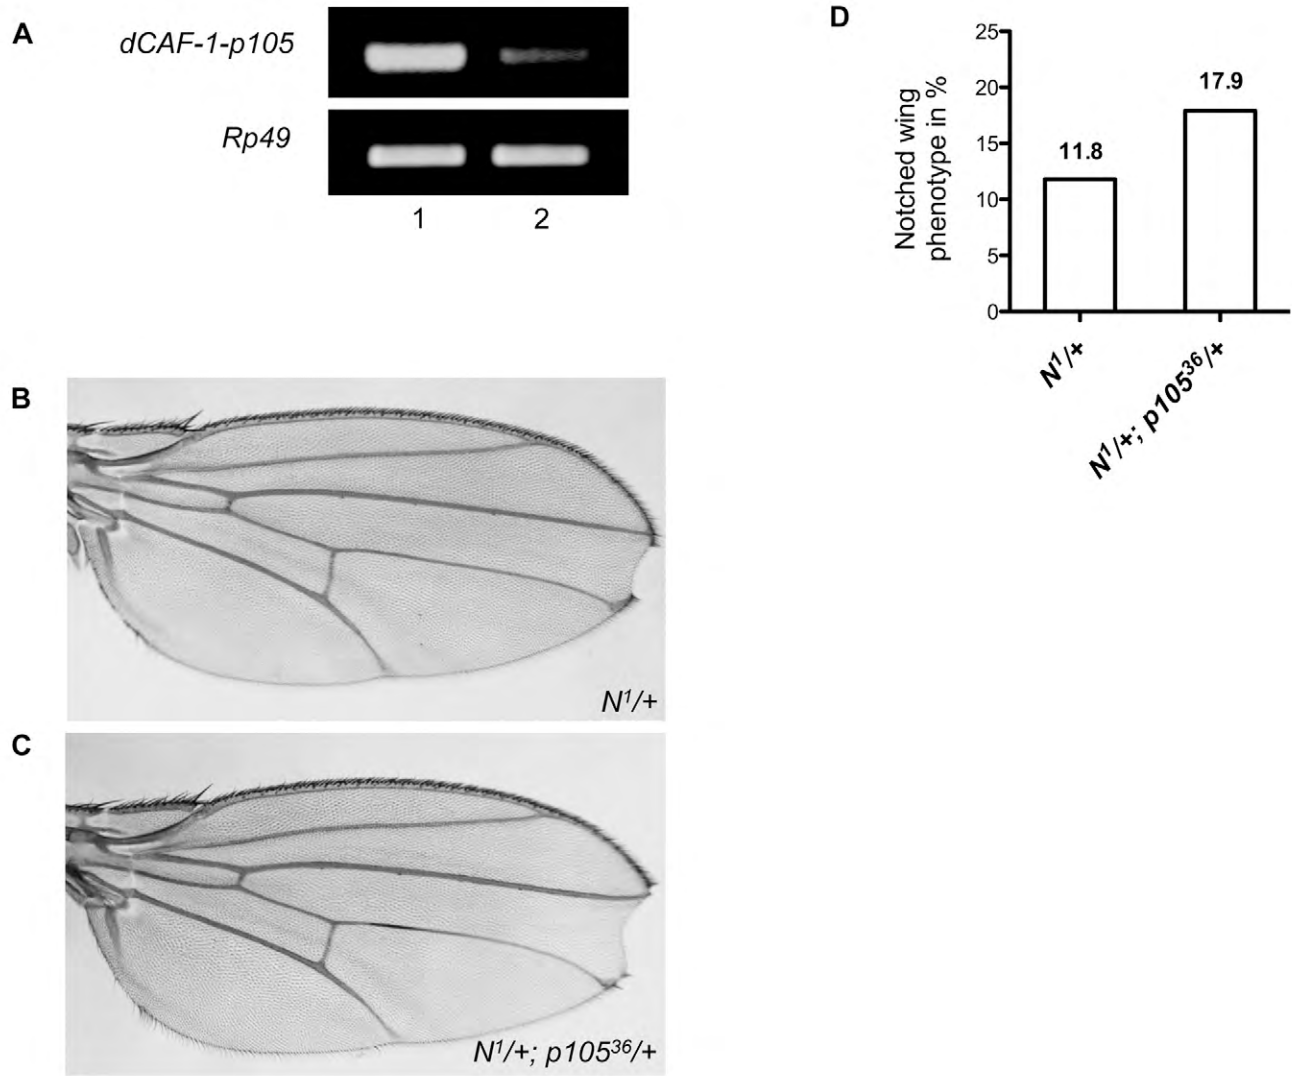

**Fig. S1. Knockdown efficiency of *dCAF-1-p105<sup>IR</sup>* and the genetic interaction between *N<sup>1</sup>* and *p105<sup>36</sup>*.** (A) RT-PCR shows that the *dCAF-1-p105* mRNA level is significantly reduced in *ey>dCAF-1-p105<sup>IR</sup>* animals. Lane 1, wild type; lane 2, *p105<sup>36</sup>* mutant. *Rp49* was used as the internal loading control. (B-D) The *p105<sup>36</sup>* mutation enhances the notched wing phenotype of *N<sup>1</sup>*. (D) Statistics of B and C. Total wings scored: (B) *n*=110; (C) *n*=134.

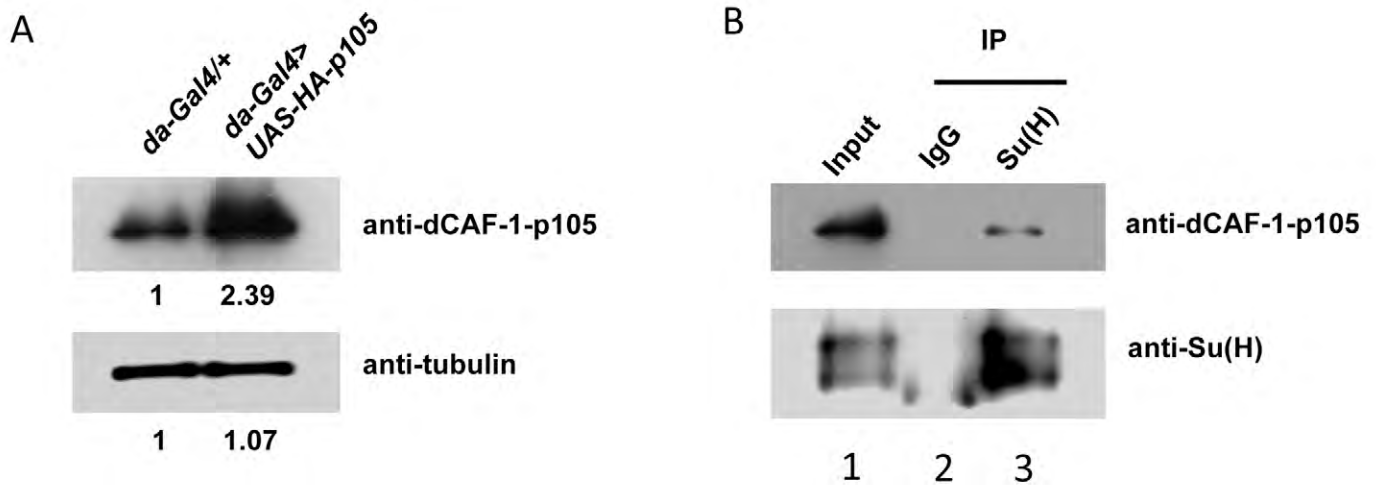

**Fig. S2. Expression of the transgene *UAS-HA-p105* and the physical interaction of dCAF-1-p105 and Su(H).** (A) Quantification of the dCAF-1-p105 protein level in *da-Gal4/+* and *da-Gal4/UAS-HA-dCAF-1-p105* embryos. Quantifications were performed using ImageJ software. (B) Physical interaction between Su(H) and endogenous dCAF-1-p105 (non-tagged).

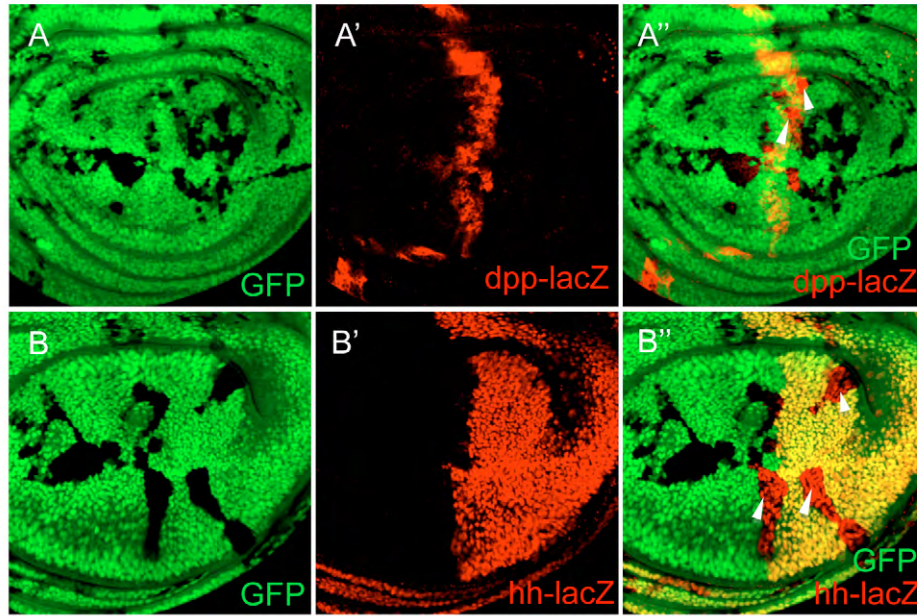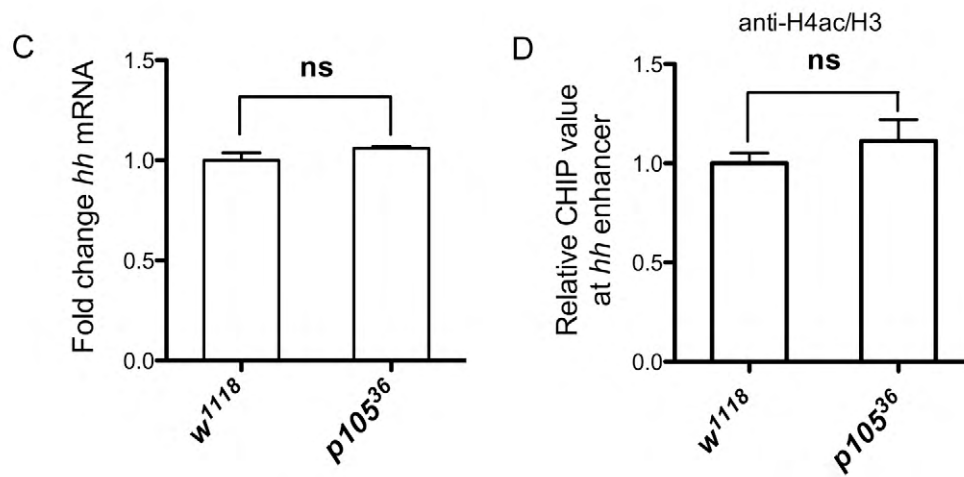

**Fig. S3. Mutation of *dCAF-1-p105* does not affect Hh signaling.** (A-B'') Expression of *dpp-lacZ* and *hh-lacZ* is unaffected in *p105*<sup>36</sup> mutant clones. *p105*<sup>36</sup> mutant clones are indicated at GFP-negative regions. *lacZ* expression is red, GFP is green. (C) *p105*<sup>36</sup> mutation did not affect *hh* transcription. (D) The H4ac level (normalized) was unchanged in the *hh* enhancer region in *p105*<sup>36</sup> mutant larvae as compared with that of the wild-type control.

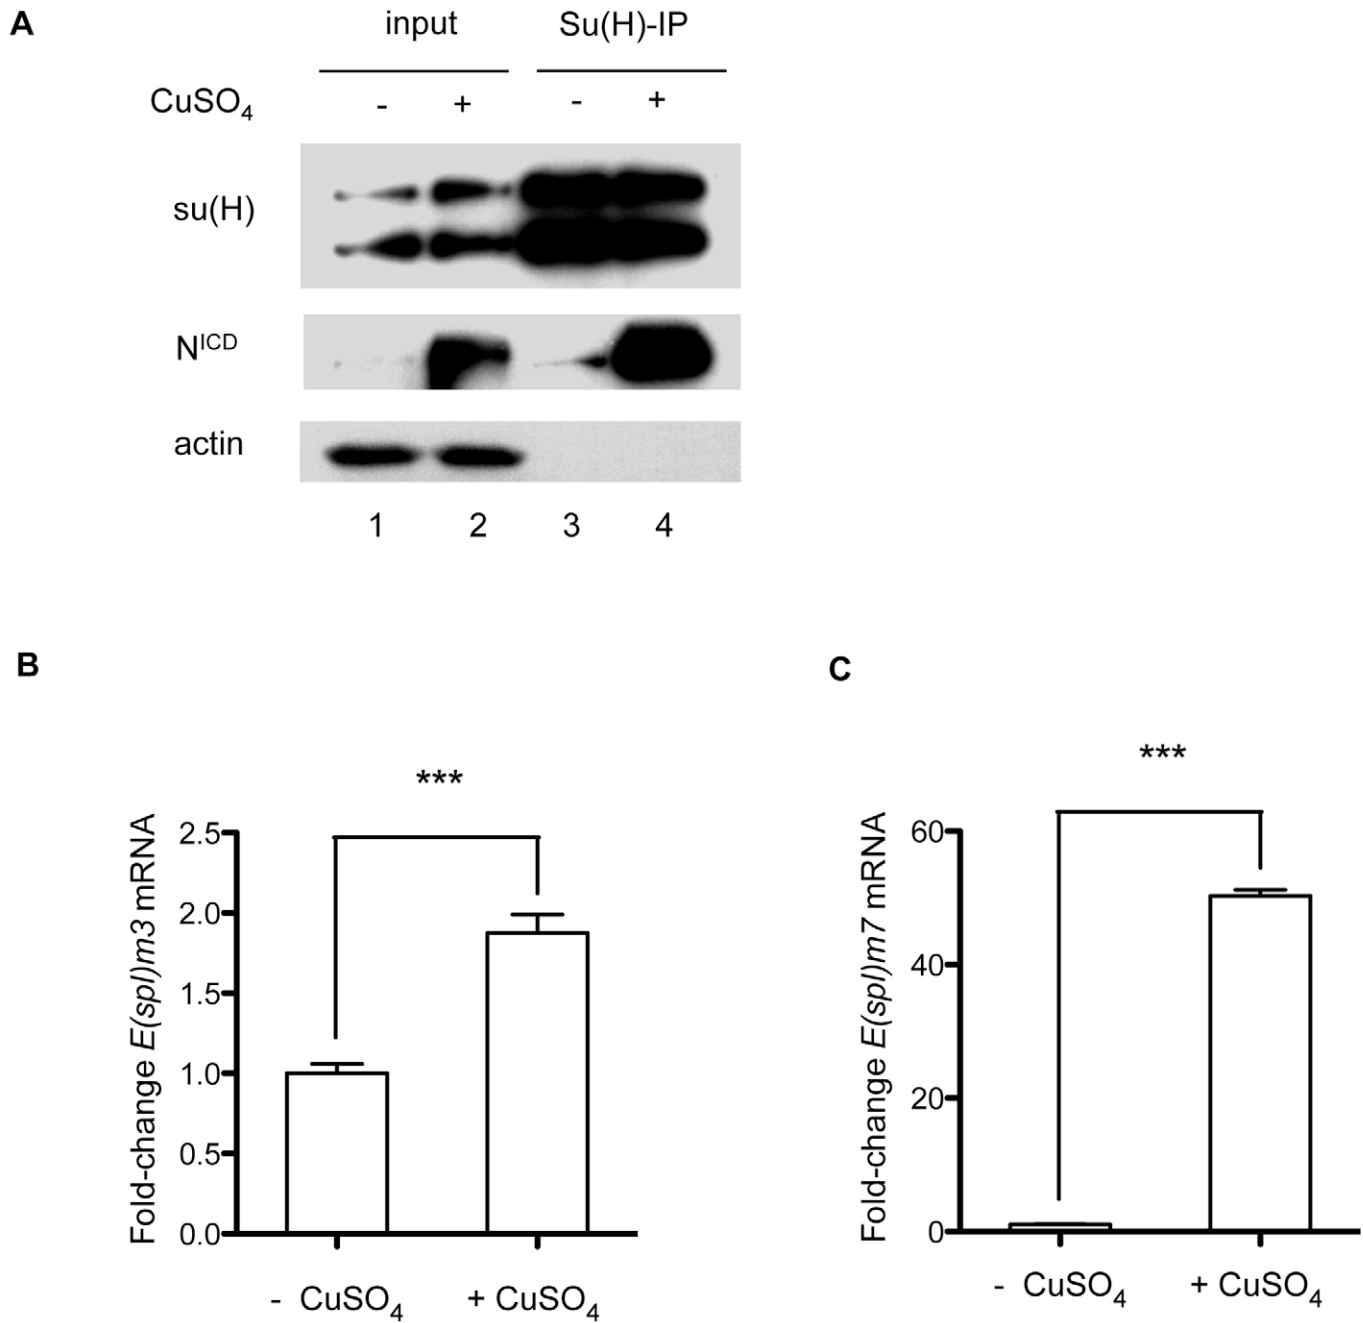

**Fig. S4. N<sup>ICD</sup> associates with Su(H) upon Notch induction in cultured S2 cells, activating the expression of Notch target genes *E(spl)m3* and *E(spl)m7*.** (A) Physical interaction between N<sup>ICD</sup> and Su(H). The CuSO<sub>4</sub> induction of full-length Notch is indicated by (+), as opposed to no induction indicated by (-). Actin was used as the loading control. (B,C) Induced expression of the Notch target genes *E(spl)m3* and *E(spl)m7*. \*\*\**P*<0.0001, Student's *t*-test.

*en>dCAF-1-p55<sup>IR</sup>*

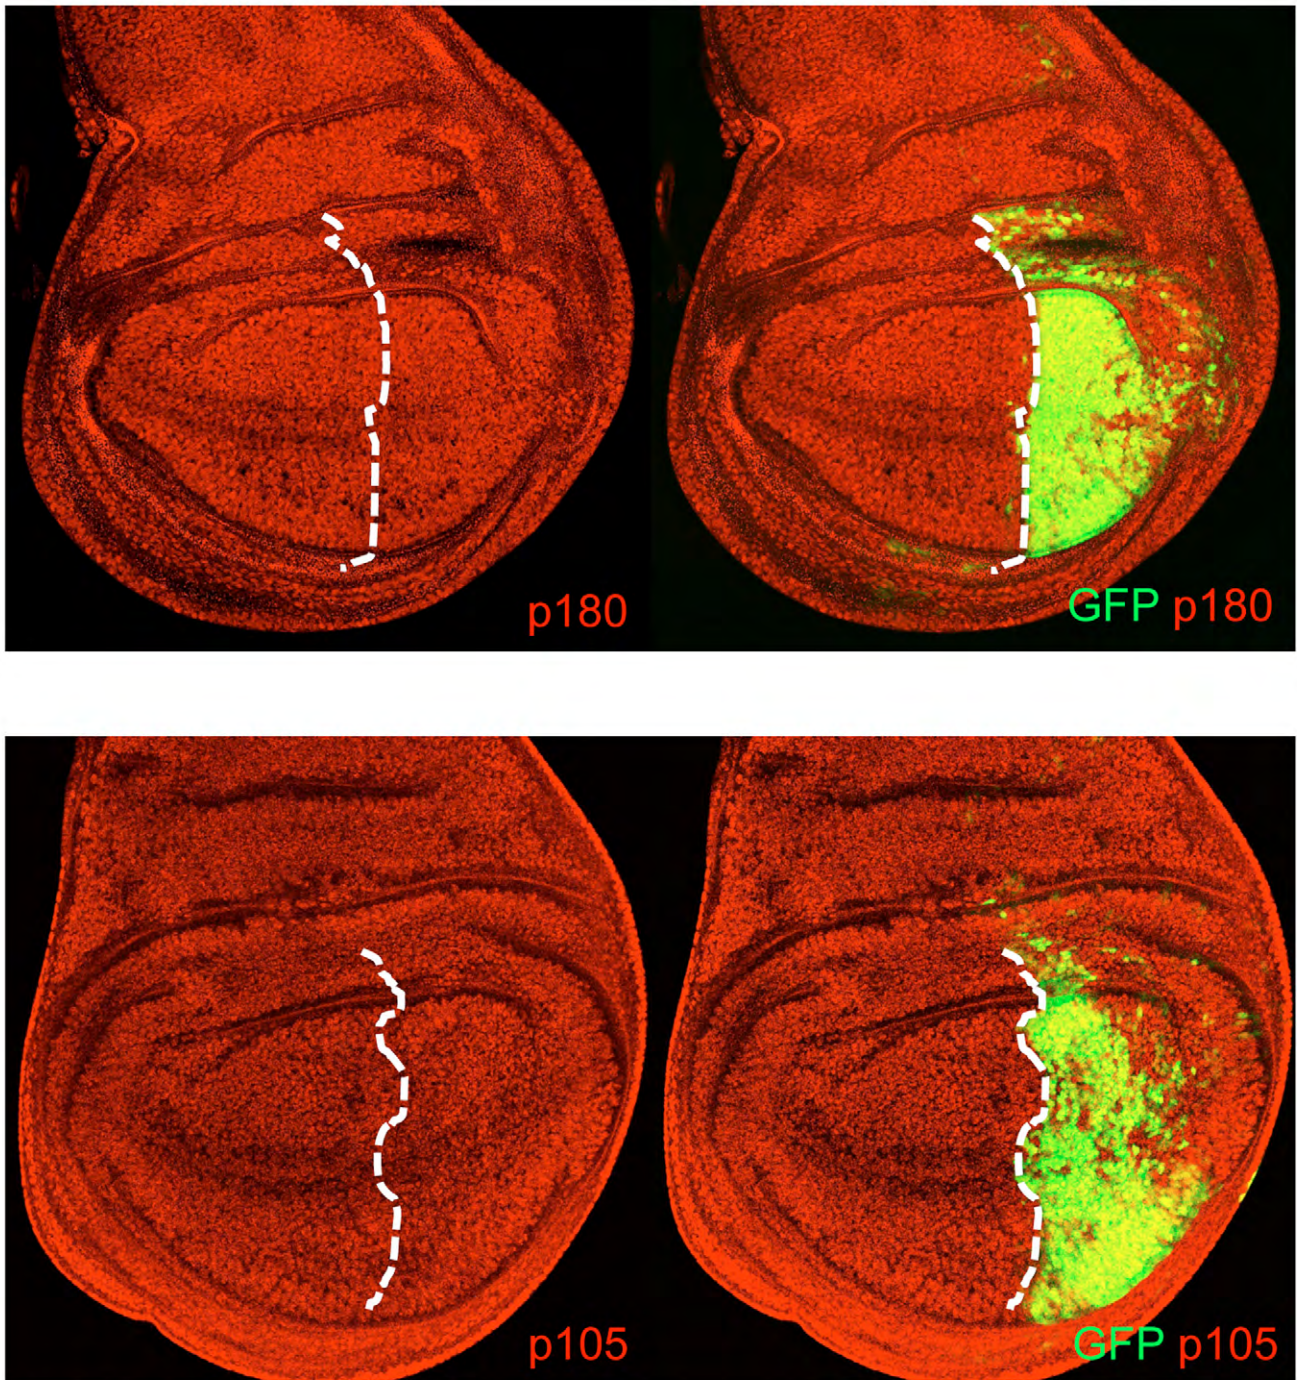

**Fig. S5. Knockdown of dCAF-1-p55 does not lead to a reduction in the protein level of dCAF-1-p180 or dCAF-1-p105.** Knocking down dCAF-1-p55 at the wing disc posterior (as indicated in green) does not apparently affect the level of dCAF-1-p180 or dCAF-1-p105 (red). The full genotype of *en>dCAF-1-p55<sup>IR</sup>* is *en-Gal4, UAS-GFP/+; UAS-dCAF-1-p55<sup>IR</sup>/+*.

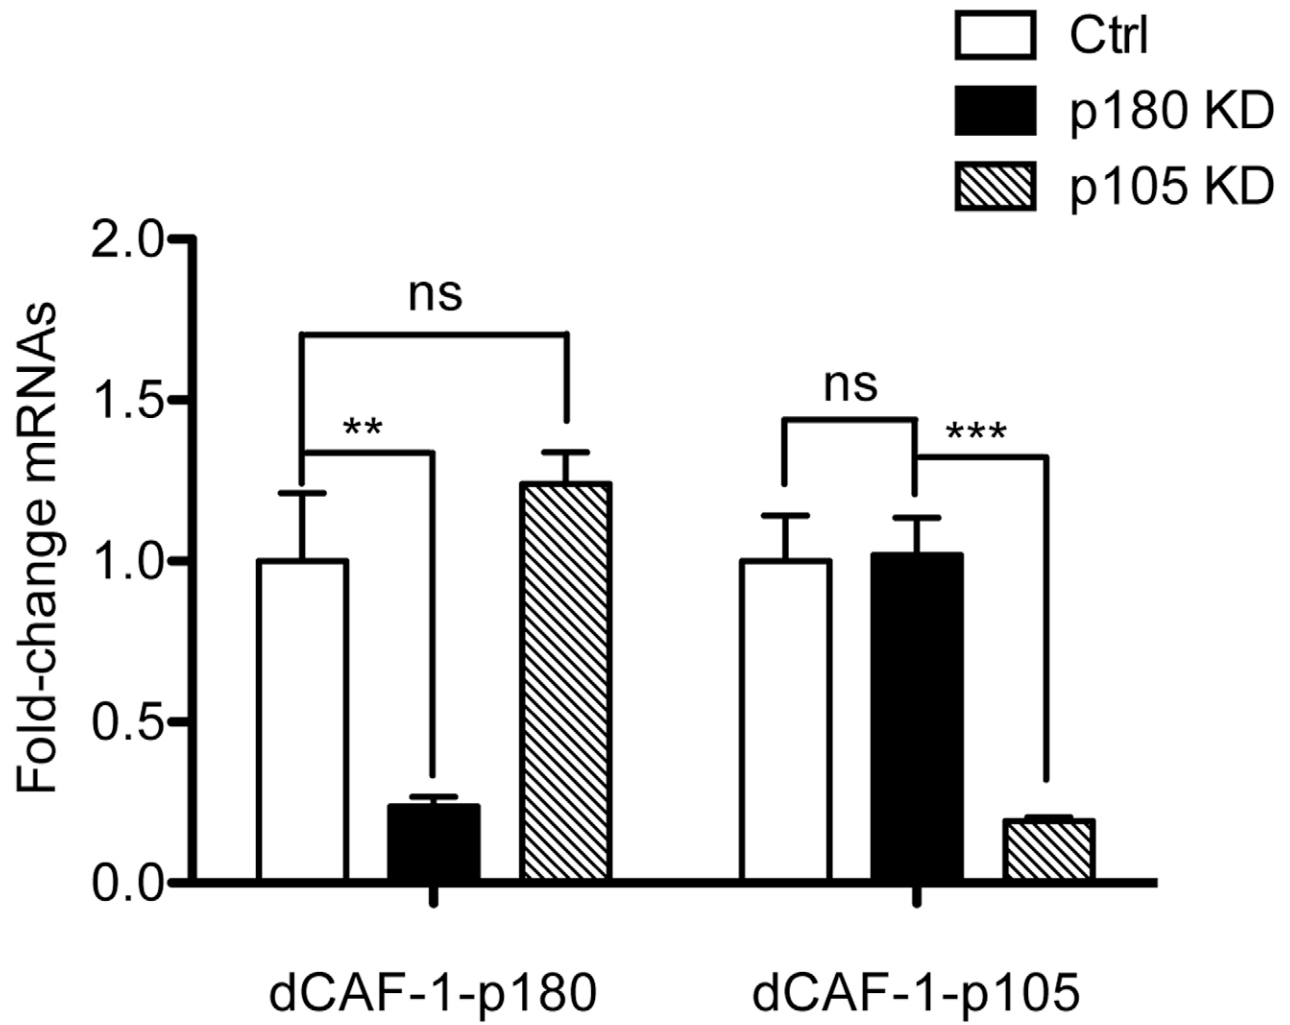

**Fig. S6. Knockdown of dCAF-1-p180 does not affect the transcription of *dCAF-1-p105* and vice versa.** Quantitative RT-PCR was used to monitor the transcription of *dCAF-1-p180* and *dCAF-1-p105* with or without RNAi to one of them. Ctrl, second instar larvae of *da-Gal4/+*; p180KD, second instar larvae of *da-Gal4/dCAF-1-p180<sup>IR</sup>*; p105KD, second instar larvae of *da-Gal4/dCAF-1-p105<sup>IR</sup>*.

**Table S1. Statistics of the fly eyes that were categorized in Fig. 1**

| Genotype            | (-) | (+) | (++) | (+++) | <i>n</i> (total) |
|---------------------|-----|-----|------|-------|------------------|
| Ctrl                | 39  | 18  | 2    | 0     | 59               |
| <i>smo</i>          | 34  | 20  | 12   | 0     | 66               |
| <i>yki</i>          | 34  | 16  | 0    | 0     | 50               |
| <i>Egfr</i>         | 25  | 15  | 6    | 0     | 46               |
| <i>tkv</i>          | 24  | 15  | 2    | 0     | 41               |
| <i>N*</i>           | 0   | 0   | 0    | 2     | 2                |
| <i>H</i>            | 36  | 0   | 0    | 0     | 36               |
| <i>Dl</i>           | 0   | 4   | 18   | 18    | 40               |
| <i>mam</i>          | 0   | 14  | 15   | 16    | 45               |
| <i>eyg</i>          | 0   | 5   | 15   | 13    | 33               |
| Rescue <sup>‡</sup> | 45  | 0   | 0    | 0     | 0                |

\*Most *N<sup>l</sup>/+*; *ey-Gal4,UAS-dCAF-1-p105<sup>IR</sup>/+* flies are lethal when cultured in 25°C.

<sup>‡</sup>*ey-Gal4,UAS-dCAF-1-p105<sup>IR</sup>/UAS-HA-dCAF-1-p105*.

**Table S2. Primers used to generate constructs for S2 cell transfections**

| Primer        | Sequence (5'-3')               |
|---------------|--------------------------------|
| NICD-F        | ATGGTCTTGAGTACGCAAAG           |
| NICD-R        | TCAAATGTAGATGGCCTCGGAAC        |
| dCAF-1-p105-F | ATGAAGTGCAAGATACCCGAGATTTTCGT  |
| dCAF-1-p105-R | GTAAAGTCTAATCTATTGCATTGTCTACTC |
| dCAF-1-p55-F  | ATGGTGGATCGCAGCGATAATG         |
| dCAF-1-p55-R  | TTAAGCGGTATTGGTTTCTAACTCG      |

pAc5.1-Myc, pAc5.1-HA and pAc5.1-Flag vectors were modified from pAc5.1 before being used for the construction of pAc5.1-HA-N<sup>ICD</sup>, pAc5.1-Flag-dCAF-1-p105, pAc5.1-Flag-dCAF-1-p55 and pAc5.1-Myc-dCAF-1-p105 using the primers above. pAc5.1-Flag-dCAF-1-p180 coding sequence was cut from UAS-dCAF-1-p180 (Song et al., 2007) and cloned into the pAc5.1-Flag vector.



**Table S3. Primers used for quantitative PCR**

| Primer                     | Sequence (5'-3')      |
|----------------------------|-----------------------|
| Rp49-F                     | ACGTTGTGCACCAGGAACTT  |
| Rp49-R                     | TACAGGCCCAAGATCGTGAA  |
| dCAF-1-p105-F              | GATGGTAAGCTGCTGTTAAC  |
| dCAF-1-p105-R              | TTCTTCTCCGCATTGTACGG  |
| E(spl)m $\beta$ -F         | GTGACCATAGCTTGATCCTC  |
| E(spl)m $\beta$ -R         | CGTTCATGCTGCCAATGAAG  |
| E(spl)m3-F                 | CGAGCCAGGATCAACAAGTG  |
| E(spl)m3-R                 | CGGTCAACTCCAGGATATCC  |
| E(spl)m7-F                 | GTTTCCGTGCTGGATACATC  |
| E(spl)m7-R                 | CTGCTCCAGTTGGTTGAGAC  |
| GAPDH-F                    | GTTCAAGTTCGATTTCGACCC |
| GAPDH-R                    | GTGGACTCCACGATGTATTC  |
| Notch-F                    | CAGTCGCGCACCAAACTT    |
| Notch-R                    | CAGTTCCGCGAACGGTGTTT  |
| dCAF-1-p180-F              | ACGAGGAGGATGATGACGAT  |
| dCAF-1-p180-R              | CGAGATGCTGCTGCTCTTTT  |
| hh-F                       | GGAAAAGGATGTCCCTGTTG  |
| hh-R                       | TCTTGCCGATGGTCTTTAGC  |
| E(spl)m $\beta$ enhancer-F | CACATGGCAAGACTTGAGAC  |
| E(spl)m $\beta$ enhancer-R | TTGGGATCCAGATACGATG   |
| hh enhancer-F              | ACGCACACTATCACACATCC  |
| hh enhancer-R              | CAGCATACTACAAGACTGG   |
